# Supplementary material for: Impact of early events and lifestyle on the gut microbiota and metabolic phenotypes in young school-age children
Source: PubMed Central journal article supplement (PMC6320620; doi:10.1186/s40168-018-0608-z), 2019-01-04

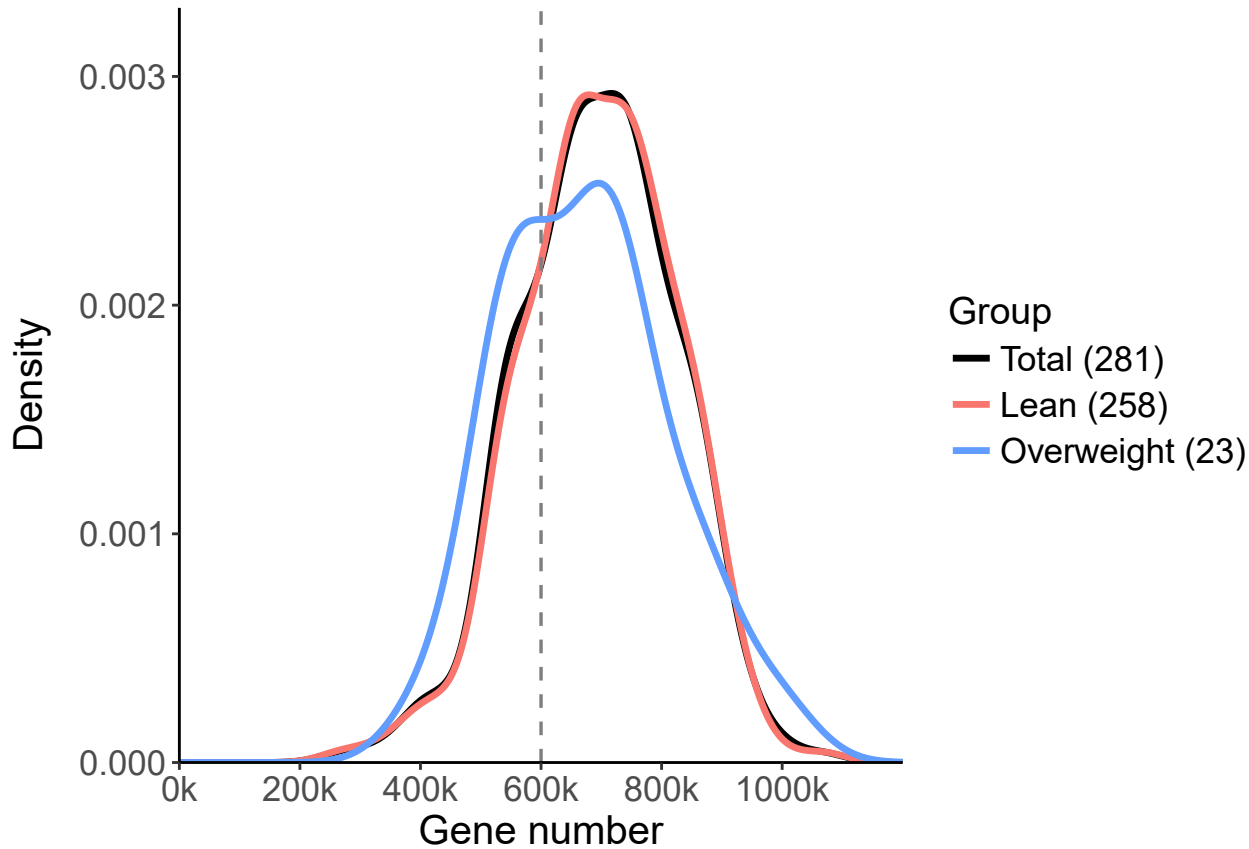

Supplement: 40168_2018_608_MOESM3_ESM.pdf [file 40168_2018_608_MOESM3_ESM.pdf]
