# Supplementary material for: Impact of early events and lifestyle on the gut microbiota and metabolic phenotypes in young school-age children
Source: PubMed Central journal article supplement (PMC6320620; doi:10.1186/s40168-018-0608-z), 2019-01-04

**a****Amino Acid Biosynthesis**

Cysteine biosynthesis, serine => cysteine(M00021)  
 Tryptophan biosynthesis, chorismate => tryptophan(M00023)  
 Threonine biosynthesis, aspartate => homoserine => threonine(M00018)  
 Proline biosynthesis, glutamate => proline(M00015)  
 Methionine biosynthesis, aspartate => homoserine => methionine(M00017)  
 Serine biosynthesis, glycerate-3P => serine(M00020)  
 Lysine biosynthesis, aspartate => lysine(M00016)  
 Leucine biosynthesis, pyruvate => 2-oxoisovalerate => leucine(M00019)

**Amino Acid Transport**

D-Methionine transport system(M00238)  
 Branched-chain amino acid transport system(M00237)  
 Glutamate transport system(M00233)

**Carbohydrate Metabolism**

Uronic acid metabolism(M00061)  
 Pectin degradation(M00081)  
 Citrate cycle, second carbon oxidation(M00011)  
 Ethylmalonyl pathway(M00373)  
 PRPP biosynthesis, ribose 5P => PRPP(M00005)  
 Entner-Doudoroff pathway, glucose-6P => glyceraldehyde-3P + pyruvate(M00008)  
 Citrate cycle, first carbon oxidation(M00010)  
 Glycolysis, core module involving three-carbon compounds(M00002)  
 Glycolysis (Embden-Meyerhof pathway), glucose => pyruvate(M00001)  
 Pentose phosphate pathway, oxidative phase, glucose 6P => ribulose 5P(M00006)  
 Pentose phosphate pathway (Pentose phosphate cycle)(M00004)

**Vitamins Biosynthesis**

Menaquinone biosynthesis, chorismate => menaquinone(M00116)  
 Pantothenate biosynthesis, valine/L-aspartate => pantothenate(M00119)  
 Riboflavin biosynthesis, GTP => riboflavin/FMN/FAD(M00125)  
 Cobalamin biosynthesis, cobinamide => cobalamin(M00122)  
 Biotin biosynthesis, pimeloyl-CoA => biotin(M00123)  
 Thiamine biosynthesis, AIR => thiamine-P/thiamine-2P(M00127)  
 Tetrahydrofolate biosynthesis, GTP => THF(M00126)

E1 VS E2

E1 VS E3

E2 VS E3

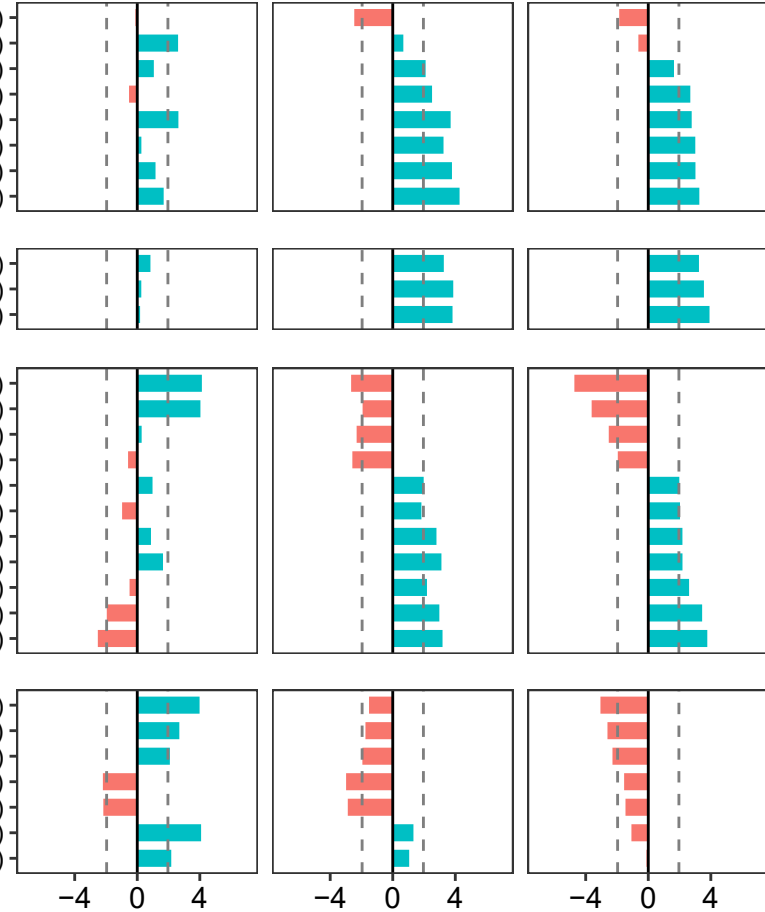

Reporter score

**b**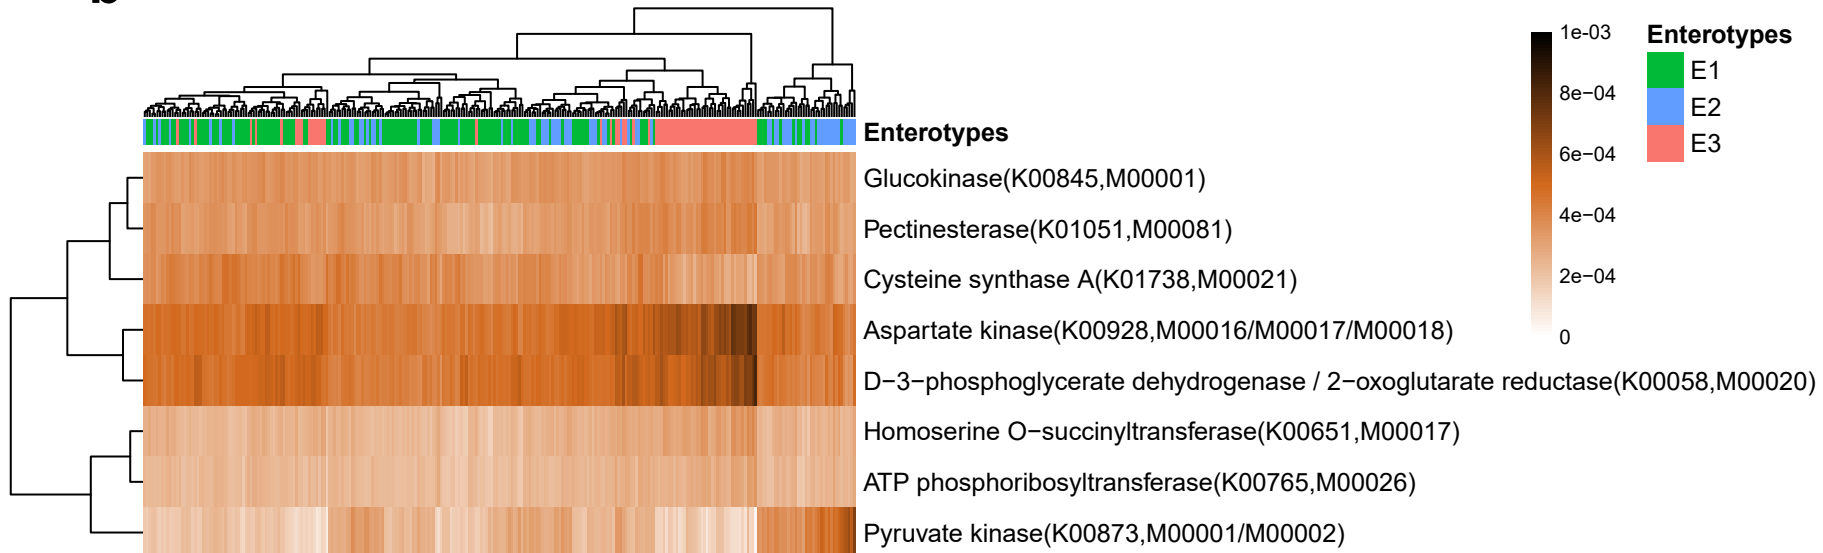

Supplement: 40168_2018_608_MOESM5_ESM.pdf [file 40168_2018_608_MOESM5_ESM.pdf]
